# Supplementary material for: Sorbitol-modified graphene oxide-iron oxide nanocomposite for efficient doxycycline removal: mechanistic and kinetic insights
Source: Royal Society of Chemistry journal article supplement (doi:10.1039/d5ra07287e), 2026-01-01
Supplement: d5ra07287e1.pdf [file d5ra07287e1.pdf]

## Supporting Information

### Sorbitol-Modified Graphene Oxide-Iron Oxide Nanocomposite for Efficient Doxycycline Removal: Mechanistic and Kinetic Insights

Afia Murshida Kusum<sup>1,3</sup>, Md Humayun Kabir<sup>2\*</sup>, Md. Safiqul Islam<sup>3</sup>, Md Sakil<sup>1,3</sup>, Sabina Yasmin<sup>1\*</sup>

<sup>1</sup>Institute of National Analytical Research and Service (INARS), Bangladesh Council of Scientific and Industrial Research (BCSIR), Dhanmondi, Dhaka-1205, Bangladesh

<sup>2</sup>Institute of Food Science and Technology (IFST), Bangladesh Council of Scientific and Industrial Research (BCSIR), Dhanmondi, Dhaka-1205, Bangladesh

<sup>3</sup>Department of Chemistry, University of Dhaka, Dhaka-1000, Bangladesh

\*Corresponding author e-mail: [sabinayasmin@bcsir.gov.bd](mailto:sabinayasmin@bcsir.gov.bd)

\*Corresponding author e-mail: [humayunkabir@bcsir.gov.bd](mailto:humayunkabir@bcsir.gov.bd)

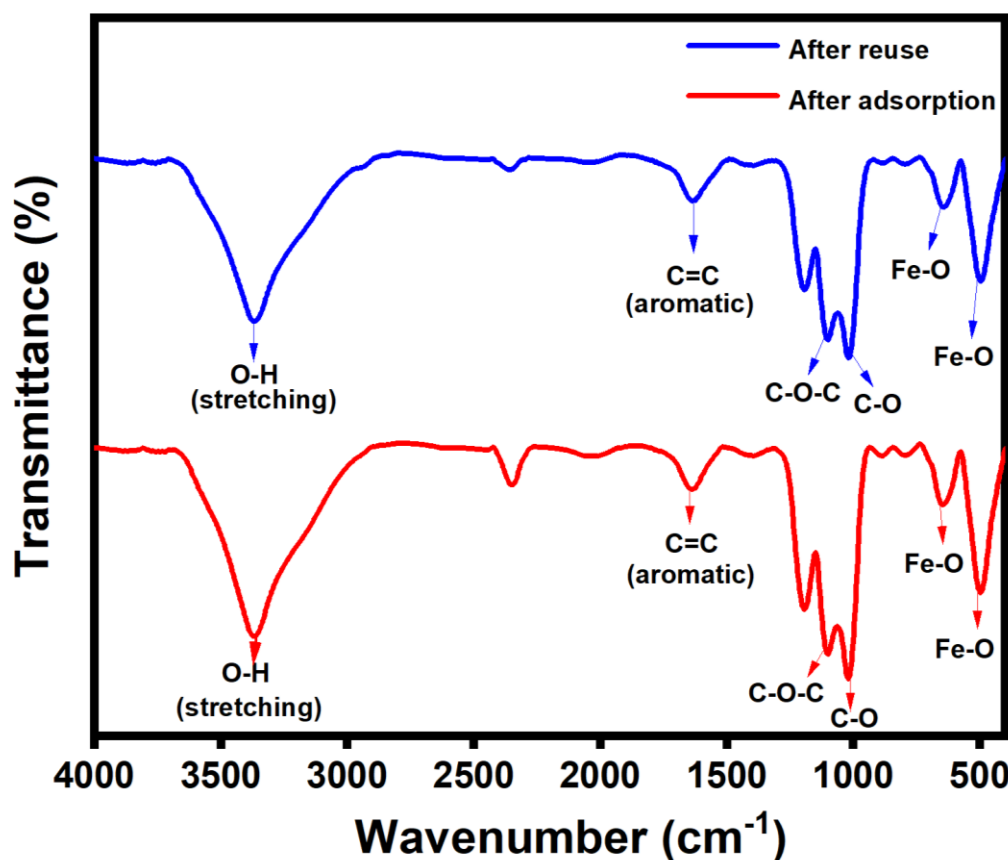

**Fig. S1** FTIR spectra showing the functional groups of the GO/Fe-SBT nanocomposite after adsorption (red curve) and after reuse (blue curve)

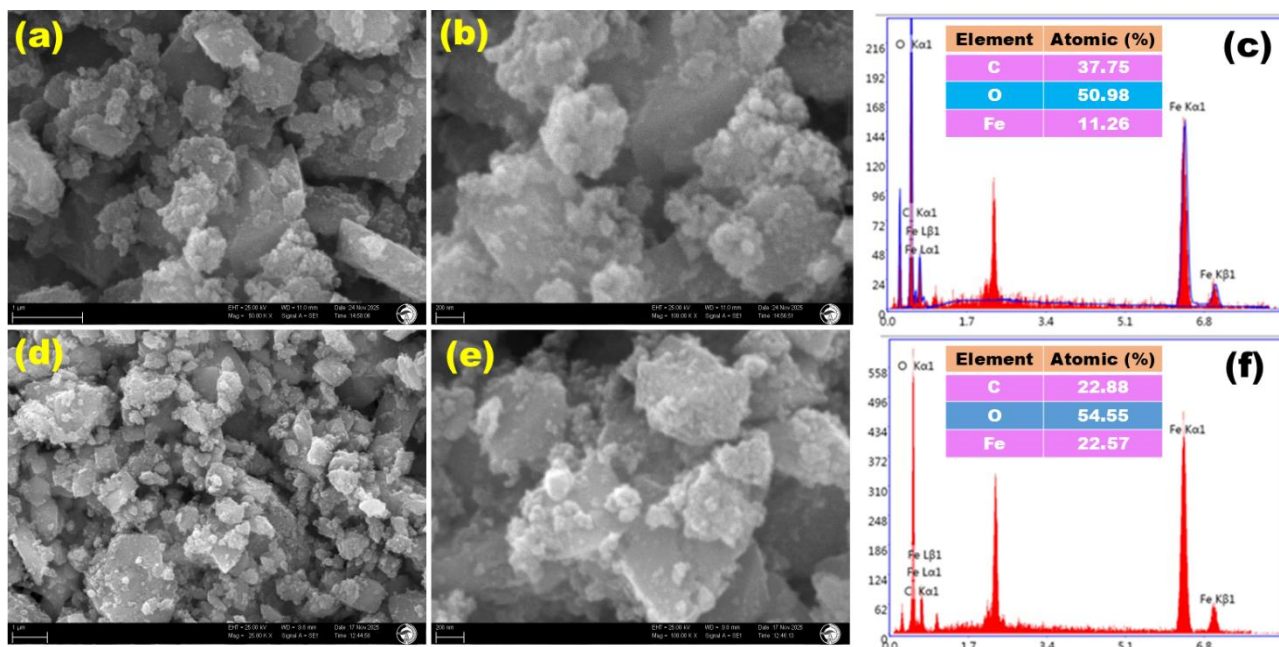

**Fig. S2** SEM images and EDX spectra of the GO/Fe-SBT nanocomposite. (a)-(c) show the composite after DOX adsorption. (d)-(f) show the composite after seven regeneration cycles
